# Supplementary material for: Nationwide Trends in Contralateral Prophylactic Mastectomies: An Analysis of 55,060 Unilateral Breast Cancer Patients
Source: PubMed Central journal article supplement — Plast Reconstr Surg Glob Open. 2022 May 25;10(5):e4344. doi: 10.1097/GOX.0000000000004344 (PMC9132527; doi:10.1097/gox.0000000000004344), 2022-05-25
Supplement: gox-10-e4344-s001.pdf [file gox-10-e4344-s001.pdf]

|                      |                                                                                                                                                                                                                                                                                                                                                                                                                                                                                                                                                                                                                                                                                                                                                                                                                                                                                                                                                                                                                                                                                                                                                                                                                                                                                                                                                                                                                                                                                                                                                                                                   |
|----------------------|---------------------------------------------------------------------------------------------------------------------------------------------------------------------------------------------------------------------------------------------------------------------------------------------------------------------------------------------------------------------------------------------------------------------------------------------------------------------------------------------------------------------------------------------------------------------------------------------------------------------------------------------------------------------------------------------------------------------------------------------------------------------------------------------------------------------------------------------------------------------------------------------------------------------------------------------------------------------------------------------------------------------------------------------------------------------------------------------------------------------------------------------------------------------------------------------------------------------------------------------------------------------------------------------------------------------------------------------------------------------------------------------------------------------------------------------------------------------------------------------------------------------------------------------------------------------------------------------------|
|                      | 0H0U3KZ, 0HRT0JZ, 0HRT0KZ, 0HRT3JZ, 0HRT3KZ, 0HRU0JZ, 0HRU0KZ, 0HRU3JZ, 0HRU3KZ, 0HUT0JZ, 0HUT0KZ, 0HUT3JZ, 0HUT3KZ, 0HUU0JZ, 0HUU0KZ, 0HUU3JZ, 0HUU3KZ, 0H0V07Z, 0H0V0JZ, 0H0V0KZ, 0H0V37Z, 0H0V3JZ, 0H0V3KZ, 0HUV0JZ, 0HUV3JZ, 0HWT0JZ, 0HWT3JZ, 0HWU0JZ, 0HWU3JZ, 0HPT0JZ, 0HPT3JZ, 0HPU0JZ, 0HPU3JZ, 0HHT0NZ, 0HHT3NZ, 0HHT7NZ, 0HHT8NZ, 0HHU0NZ, 0HHU3NZ, 0HHU7NZ, 0HHU8NZ, 0HHV0NZ, 0HHV3NZ, 0HHV7NZ, 0HHV8NZ, 0HHW0NZ, 0HH3NZ, 0HHW7NZ, 0HHW8NZ, 0HHX0NZ, 0HHX3NZ, 0HHX7NZ, 0HHX8NZ, 0HPT0NZ, 0HPT3NZ, 0HPU0NZ, 0HPU3NZ                                                                                                                                                                                                                                                                                                                                                                                                                                                                                                                                                                                                                                                                                                                                                                                                                                                                                                                                                                                                                                                                    |
| Autologous, NOS      | 0HRT37Z, 0HRU37Z, 0HRV37Z, 0JD03ZZ, 0JD13ZZ, 0JD43ZZ, 0JD53ZZ, 0JD63ZZ, 0JD73ZZ, 0JD83ZZ, 0JD93ZZ, 0JDB3ZZ, 0JDC3ZZ, 0JDD3ZZ, 0JDF3ZZ, 0JDG3ZZ, 0JDH3ZZ, 0JDJ3ZZ, 0JDK3ZZ, 0JDL3ZZ, 0JDM3ZZ, 0JDN3ZZ, 0JDP3ZZ, 0JDQ3ZZ, 0JDR3ZZ, 0HRT07Z, 0HRT0JZ, 0HRT0KZ, 0HRU07Z, 0HRU0JZ, 0HRU0KZ                                                                                                                                                                                                                                                                                                                                                                                                                                                                                                                                                                                                                                                                                                                                                                                                                                                                                                                                                                                                                                                                                                                                                                                                                                                                                                             |
| Autologous, pedicled | 0HRT075, 0HRU075, 0HRV075, 0KXK0Z6, 0KXK4Z6, 0KXL0Z6, 0KXL4Z6, 0HX5XZZ, 0HX0XZZ, 0HX1XZZ, 0HX4XZZ, 0HX5XZZ, 0HX6XZZ, 0HX7XZZ, 0HX8XZZ, 0HXAXZZ, 0HXBXZZ, 0HXCXZZ, 0HXDXZZ, 0HXEXZZ, 0HFXXZZ, 0HXGXZZ, 0HXHXZZ, 0HXJXZZ, 0HXKXZZ, 0HXLXZZ, 0HXMXXZZ, 0HXNXZZ, 0H80XZZ, 0H81XZZ, 0H84XZZ, 0H85XZZ, 0H86XZZ, 0H87XZZ, 0H88XZZ, 0H8AXZZ, 0H8BXZZ, 0H8CXZZ, 0H8DXZZ, 0H8EXZZ, 0H8FXZZ, 0H8GXZZ, 0H8HXZZ, 0H8JXZZ, 0H8KXZZ, 0H8LXZZ, 0H8MXZZ, 0H8NXZZ, 0KXH0ZZ, 0KXH4ZZ, 0KXJ0ZZ, 0KXJ4ZZ, 0HX0XZZ, 0HX1XZZ, 0HX4XZZ, 0HX5XZZ, 0HX6XZZ, 0HX7XZZ, 0HX8XZZ, 0HX9XZZ, 0HAXZZ, 0HXBXZZ, 0HXCXZZ, 0HXDXZZ, 0HXEXZZ, 0HFXZZ, 0HXGXZZ, 0HXHXZZ, 0HXJXZZ, 0HXKXZZ, 0HXLXZZ, 0HXMXXZZ, 0HXNXZZ, 0HX0XZZ, 0HX1XZZ, 0HX4XZZ, 0HX5XZZ, 0HX6XZZ, 0HX7XZZ, 0HX8XZZ, 0HAXZZ, 0HXBXZZ, 0HXCXZZ, 0HXDXZZ, 0HXEXZZ, 0HXHXZZ, 0HXJXZZ, 0HXKXZZ, 0HXLXZZ, 0HXMXXZZ, 0HXNXZZ, 0JX00ZB, 0JX00ZC, 0JX03ZB, 0JX03ZC, 0JX10ZB, 0JX10ZC, 0JX13ZB, 0JX13ZC, 0JX40ZB, 0JX40ZC, 0JX43ZB, 0JX43ZC, 0JX50ZB, 0JX50ZC, 0JX53ZB, 0JX53ZC, 0JX60ZB, 0JX60ZC, 0JX63ZB, 0JX63ZC, 0JX70ZB, 0JX70ZC, 0JX73ZB, 0JX73ZC, 0JX80ZB, 0JX80ZC, 0JX83ZB, 0JX83ZC, 0JX90ZB, 0JX90ZC, 0JX93ZB, 0JX93ZC, 0JXB0ZB, 0JXB0ZC, 0JXB3ZB, 0JXB3ZC, 0JXC0ZB, 0JXC0ZC, 0JXC3ZB, 0JXC3ZC, 0JXD0ZB, 0JXD0ZC, 0JXD3ZB, 0JXD3ZC, 0JXF0ZB, 0JXF0ZC, 0JXF3ZB, 0JXF3ZC, 0JXG0ZB, 0JXG0ZC, 0JXG3ZB, 0JXG3ZC, 0JXH0ZB, 0JXH0ZC, 0JXH3ZB, 0JXH3ZC, 0JXL0ZB, 0JXL0ZC, 0JXL3ZB, 0JXL3ZC, 0JXM0ZB, 0JXM0ZC, 0JXM3ZB, 0JXM3ZC, 0JXN0ZB, 0JXN0ZC, 0JXN3ZB, 0JXN3ZC, 0JXP0ZB, 0JXP0ZC, 0JXP3ZB, 0JXP3ZC, 0JXQ0ZB, 0JXQ0ZC, 0JXQ3ZB, 0JXQ3ZC, 0JXR0ZB, 0JXR0ZC, 0JXR3ZB, 0JXR3ZC |
| Autologous, free     | 0HRT076, 0HRU076, 0HRV076, 0HRT077, 0HRU077, 0HRV077, 0HRT078, 0HRU078, 0HRV078, 0HRT079, 0HRU079, 0HRV079                                                                                                                                                                                                                                                                                                                                                                                                                                                                                                                                                                                                                                                                                                                                                                                                                                                                                                                                                                                                                                                                                                                                                                                                                                                                                                                                                                                                                                                                                        |
| CPT/HCPCS code       |                                                                                                                                                                                                                                                                                                                                                                                                                                                                                                                                                                                                                                                                                                                                                                                                                                                                                                                                                                                                                                                                                                                                                                                                                                                                                                                                                                                                                                                                                                                                                                                                   |
| NOS                  | 19324, 19350, 19366, 19380                                                                                                                                                                                                                                                                                                                                                                                                                                                                                                                                                                                                                                                                                                                                                                                                                                                                                                                                                                                                                                                                                                                                                                                                                                                                                                                                                                                                                                                                                                                                                                        |
| Implant              | 19325, 19340, 19342, 19567, L8600                                                                                                                                                                                                                                                                                                                                                                                                                                                                                                                                                                                                                                                                                                                                                                                                                                                                                                                                                                                                                                                                                                                                                                                                                                                                                                                                                                                                                                                                                                                                                                 |
| Autologous, pedicled | 19361, 19367-19369                                                                                                                                                                                                                                                                                                                                                                                                                                                                                                                                                                                                                                                                                                                                                                                                                                                                                                                                                                                                                                                                                                                                                                                                                                                                                                                                                                                                                                                                                                                                                                                |
| Autologous, free     | 19364, S2066-S2068                                                                                                                                                                                                                                                                                                                                                                                                                                                                                                                                                                                                                                                                                                                                                                                                                                                                                                                                                                                                                                                                                                                                                                                                                                                                                                                                                                                                                                                                                                                                                                                |
| <b>Exclusions</b>    |                                                                                                                                                                                                                                                                                                                                                                                                                                                                                                                                                                                                                                                                                                                                                                                                                                                                                                                                                                                                                                                                                                                                                                                                                                                                                                                                                                                                                                                                                                                                                                                                   |

|                                                                                                                                                                                                                     |                                                                                                                                |
|---------------------------------------------------------------------------------------------------------------------------------------------------------------------------------------------------------------------|--------------------------------------------------------------------------------------------------------------------------------|
| ICD-10 diagnosis codes                                                                                                                                                                                              |                                                                                                                                |
| Breast cancer (both sides)                                                                                                                                                                                          | <u>Right</u> : C50.011, C50.111, C50.211, C50.311, C50.411, C50.511, C50.611, C50.811, C50.911, D05.01, D05.11, D05.81, D05.91 |
|                                                                                                                                                                                                                     | <u>Left</u> : C50.012, C50.112, C50.212, C50.312, C50.412, C50.512, C50.612, C50.812, C50.912, D05.02, D05.12, D05.82, D05.92  |
| <u>Abbreviations</u> : ICD-10, International Classification of Diseases Tenth Revision; CPT/HCPCS, Current Procedural Terminology/Healthcare Common Procedures Classification System; NOS, not otherwise specified. |                                                                                                                                |

**Supplementary Table 1:** ICD and CPT Codes
